# Supplementary material for: Evaluation of a New Workplace Protection Factor–Measuring Method for Filtering Facepiece Respirator
Source: PubMed Central journal article supplement — Saf Health Work. 2019 Nov 13;11(1):61–70. doi: 10.1016/j.shaw.2019.11.001 (PMC7078565; doi:10.1016/j.shaw.2019.11.001), 2019-11-13
Supplement: mmc1.pdf [file mmc1.pdf]

## Supplementary material

The empirical distributions (histogram) of aerodynamic diameters as measured by ELPI™ are presented in Figure 1-6. All the results are the arithmetic mean values of three repetitions. Both X-axis and Y-axis are displayed on a logarithmic scale.

Figures 1 and 4 have been discussed in the text. The other figures are presented here for the sake of completeness.

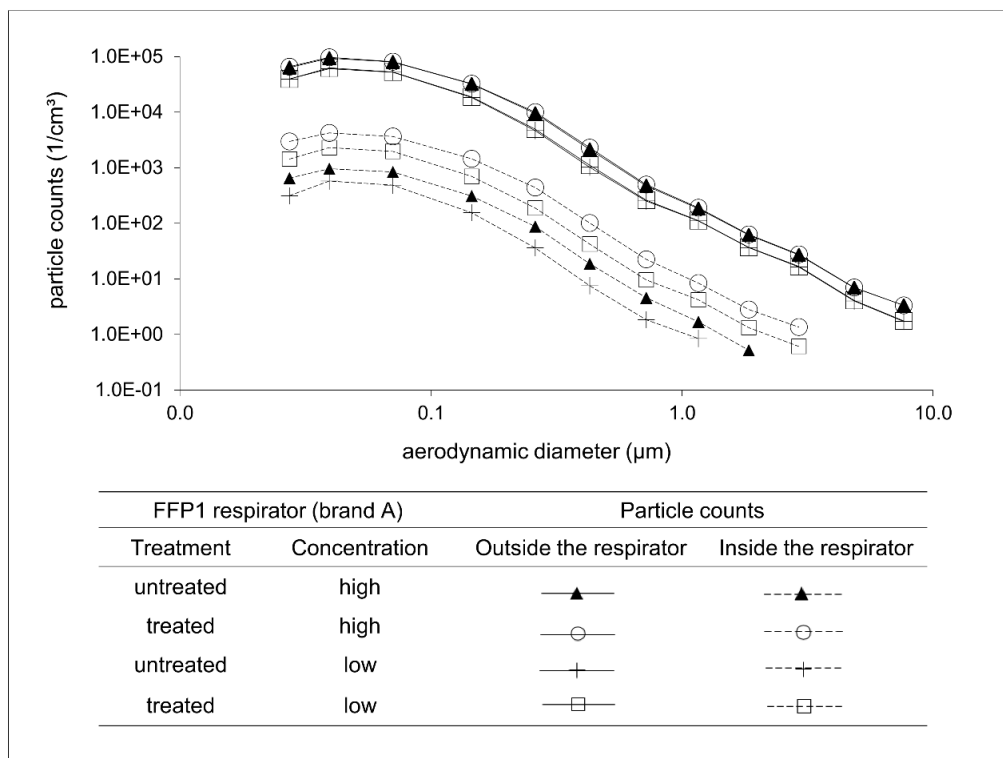

**Fig. 1** Particle size distribution of FFP1 respirator from brand A

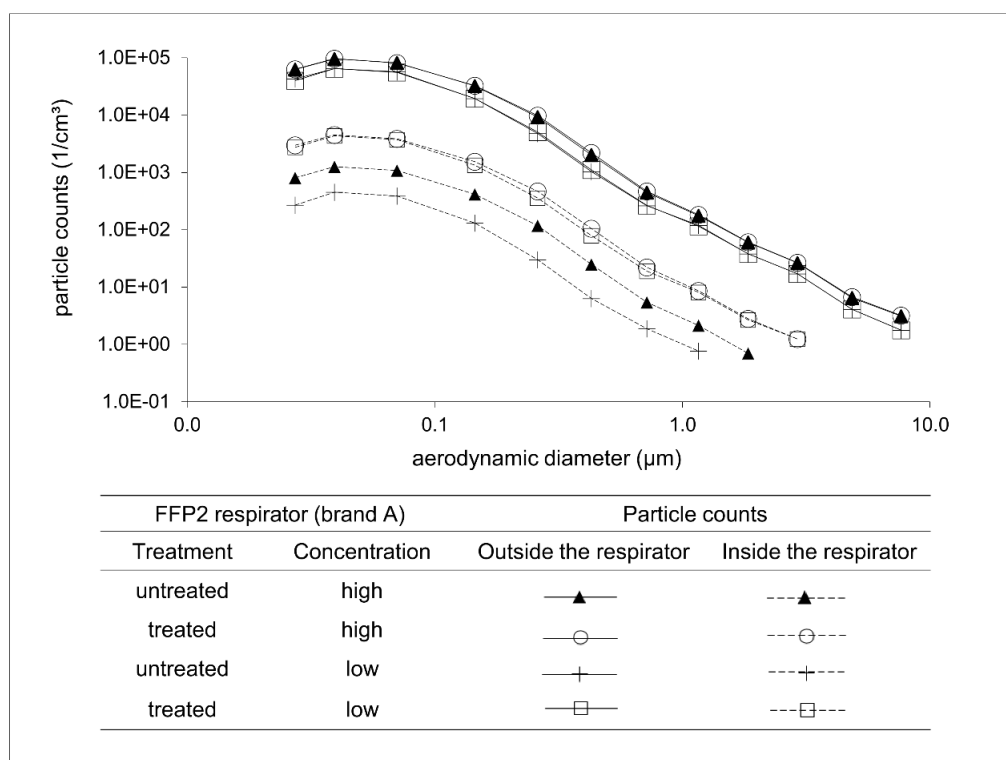

**Fig. 2** Particle size distribution of FFP2 respirator from brand A

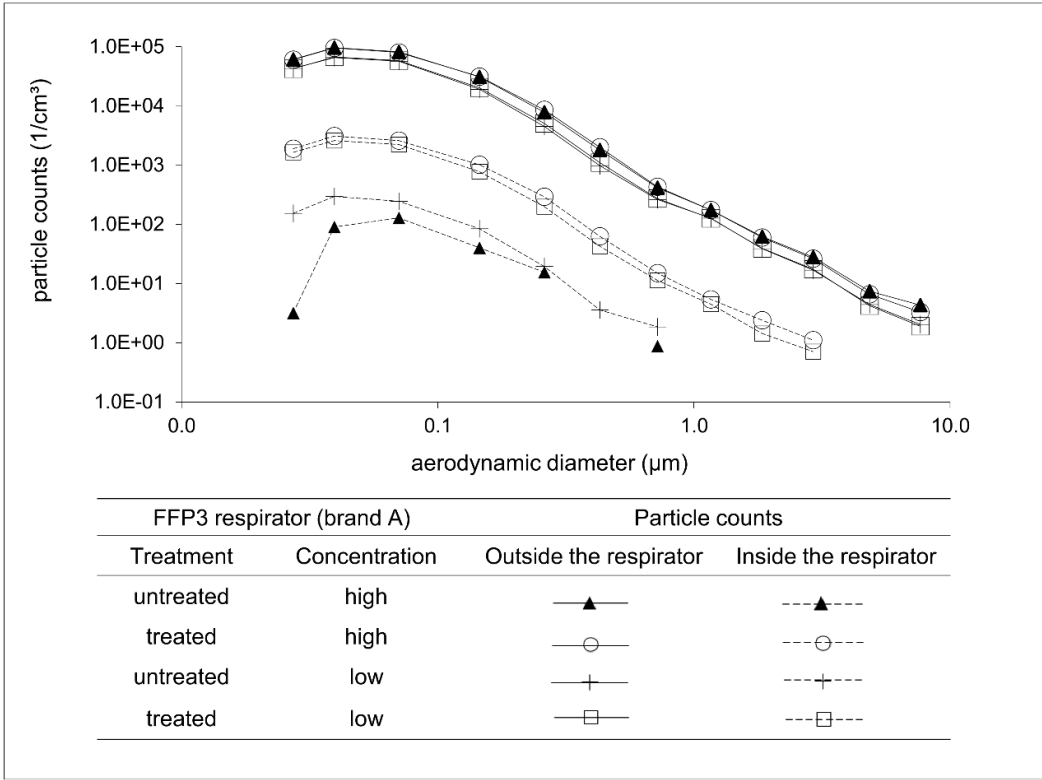

**Fig. 3** Particle size distribution of FFP3 respirator from brand A

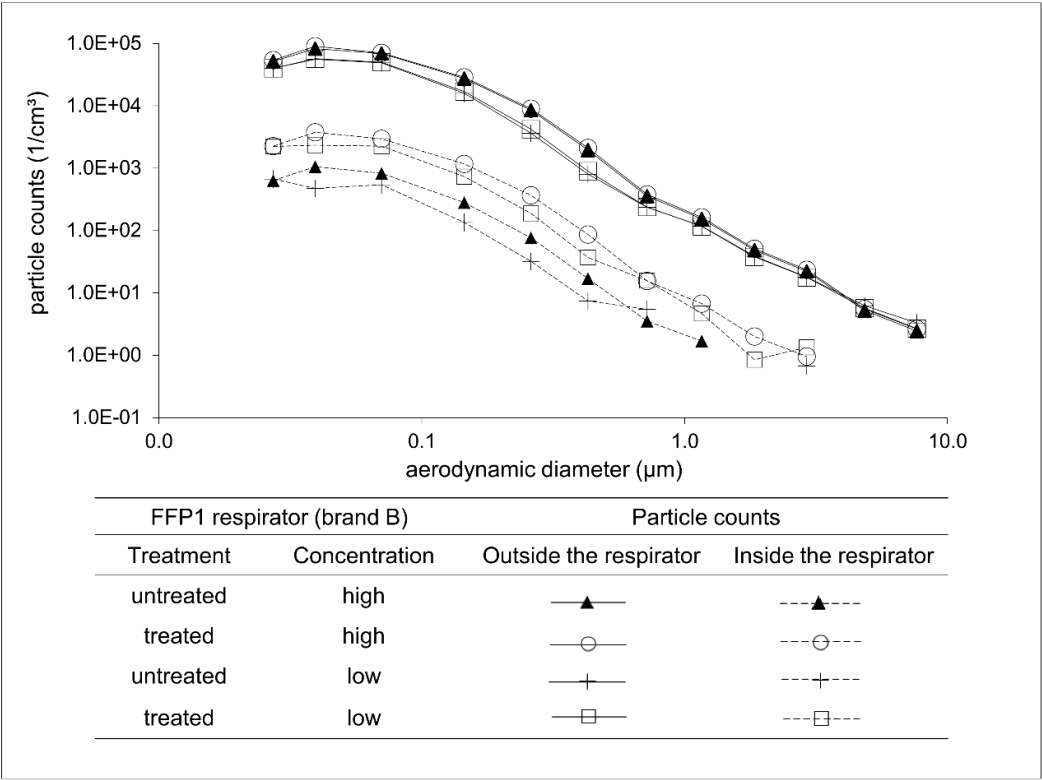

**Fig. 4** Particle size distribution of FFP1 respirator from brand B

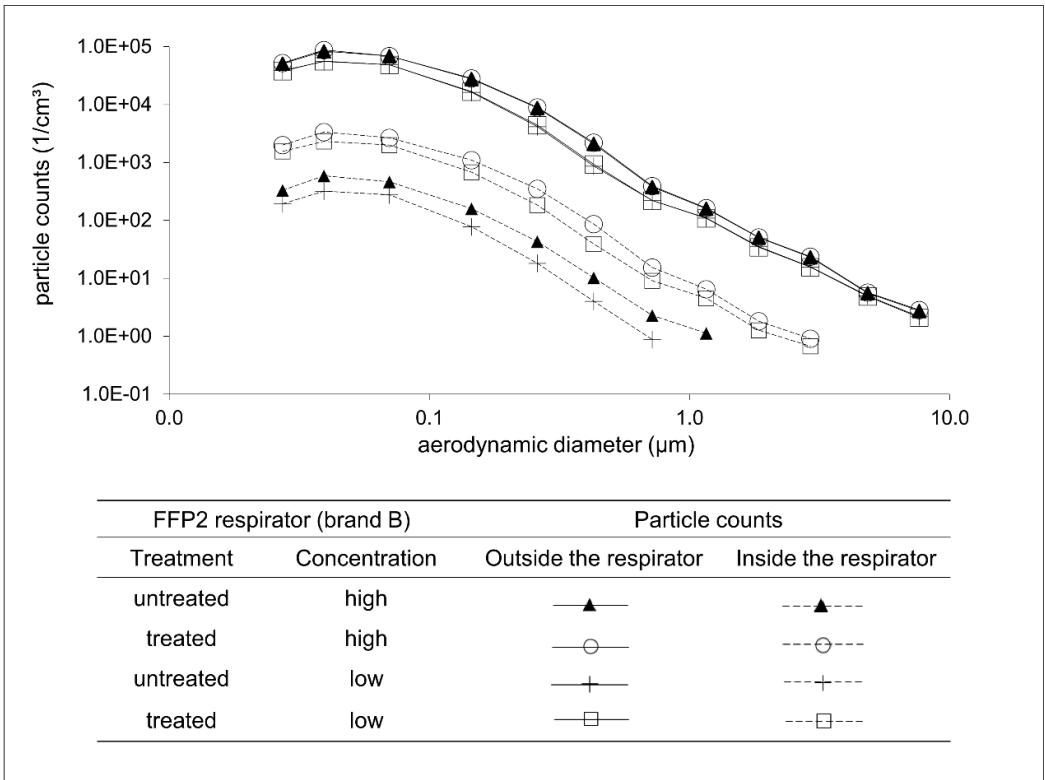

**Fig. 5** Particle size distribution of FFP2 respirator from brand B

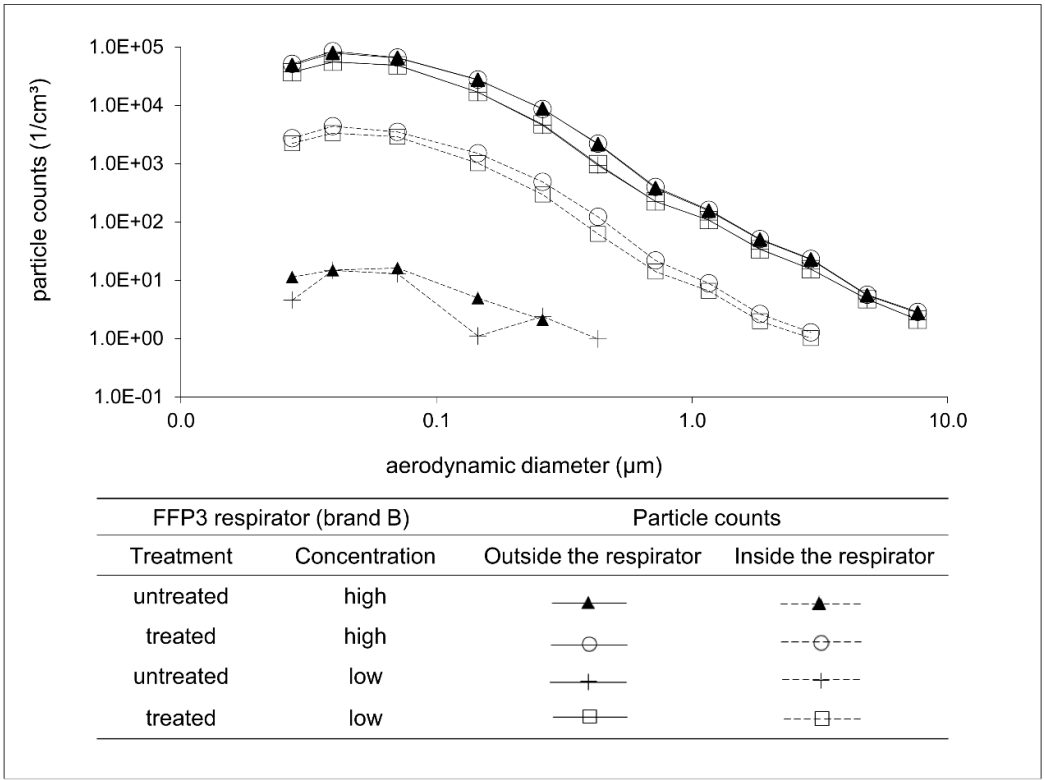

**Fig. 6** Particle size distribution of FFP3 respirator from brand B
